# Supplementary material
Source: PubMed Central journal article supplement (PMC10625714)
Supplement: NIHMS1932712-supplement-SI.pdf [file NIHMS1932712-supplement-SI.pdf]

## Table of Contents

### Supplementary Tables

Supplementary Table 1. Oligonucleotides used in this study.

Supplementary Table 2. Cas12f target sequences.

Supplementary Table 3. Cas12a target sequences.

Supplementary Table 4. Cas9 target sequences.

Supplementary Table 5. Cryo-EM data collection, refinement, and validation statistics.

Supplementary Table 6. Numbers of potential off-target sites predicted by Cas-OFFinder for all AsCas12f targets.

### Supplementary Figures

Supplementary Figure 1. Phylogenetic tree of Cas12f family proteins. Hypothetical proteins are denoted by Genbank protein accession numbers.

Supplementary Figure 2. Full sequence alignment of AsCas12f and other Cas12f family proteins.

Supplementary Figure 3. Gene-editing performance of AsCas12f variants that bear single-point mutations at *TP53-1* (top) and *HEXA* (bottom) loci in HEK293T cells.

Supplementary Figure 4. AsCas12f variants with increased gene-editing efficiency.

Supplementary Figure 5. *In vitro* DNA cleavage by wild-type AsCas12f and enAsCas12f.

Supplementary Figure 6. Representative deep sequencing data processed by CRISPEResso2 showing DNA-editing patterns generated by wild-type AsCas12f and enAsCas12f.

Supplementary Figure 7. Performance of engineered AsCas12f across a wide range of target sites with different PAM sequences.

Supplementary Figure 8. Comparison between enAsCas12f, AsCas12a, and SpCas9.

Supplementary Figure 9. Single-particle cryo-EM analysis of the AsCas12f-gRNA-DNA complex.

Supplementary Figure 10. The C-lobe of AsCas12f.2 was not fully resolved.

Supplementary Figure 11. Comparison of the AsCas12f the UnCas12f complexes.

Supplementary Figure 12. Dimerization is essential for the activity of AsCas12f.

Supplementary Figure 13. PAM and sgRNA recognition by AsCas12f.

Supplementary Figure 14. Comparison of AsCas12f and UnCas12f gRNAs.

Supplementary Figure 15. AsCas12f-gRNA interactions.

Supplementary Figure 16. Schematics showing modifications on the AsCas12f gRNA.

Supplementary Figure 17. Genome-wide specificity of wild-type and engineered AsCas12f variants.

Supplementary Figure 18. Uncropped scans for blots shown in Supplementary Fig. 5a.

**Supplementary Table 1. Oligonucleotides used in this study.**

| Name                      | Assay                             | Sequence (5' to 3')                                                                                                                                                                                                          |
|---------------------------|-----------------------------------|------------------------------------------------------------------------------------------------------------------------------------------------------------------------------------------------------------------------------|
| oGS1 (dsODN Fwd)          | GUIDE-seq                         | /5Phos/GTTTAATTGAGTTGTCATATGTTAATA<br>ACGGT*A*T                                                                                                                                                                              |
| oGS2 (dsODN Rev)          |                                   | /5Phos/ATACCGTTATTAACATATGACAACCTC<br>AATTAA*A*C                                                                                                                                                                             |
| T <sub>6</sub> -RT primer | Quantify sgRNA expression         | TGGAGTTCAGACGTGTGCTCTTCCGATCTTT<br>TTTT                                                                                                                                                                                      |
| sgRNA Fwd                 |                                   | GGCCTTTTTACGGTTCCTGGCCTT                                                                                                                                                                                                     |
| sgRNA Rev                 |                                   | TGGAGTTCAGACGTGTGCTCTTCC                                                                                                                                                                                                     |
| HBB Fwd                   | CRISPRa qPCR                      | GCACGTGGATCCTGAGAACT                                                                                                                                                                                                         |
| HBB Rev                   |                                   | ATTGGACAGCAAGAAAGCGAG                                                                                                                                                                                                        |
| HBG Fwd                   |                                   | GCTGAGTGAACCTGCACTGTGA                                                                                                                                                                                                       |
| HBG Rev                   |                                   | GAATTCTTTGCCGAAATGGA                                                                                                                                                                                                         |
| IL1RN Fwd                 |                                   | GGAATCCATGGAGGGAAGAT                                                                                                                                                                                                         |
| IL1RN Rev                 |                                   | TGTTCTCGCTCAGGTCAGTG                                                                                                                                                                                                         |
| GAPDH Fwd                 | qPCR                              | GTCTCCTCTGACTTCAACAGCG                                                                                                                                                                                                       |
| GAPDH Rev                 |                                   | ACCACCCTGTTGCTGTAGCCAA                                                                                                                                                                                                       |
| DNA-Fwd                   | Cryo-EM                           | AAAACAGGTTTTTGGCTCTCAAGACCCACAAT<br>CCAGGCCGGAA                                                                                                                                                                              |
| DNA-Rev                   |                                   | TTCCGGCCTGGATTGTGGGTCTTGAGAGCAA<br>AAACCTGTTTT                                                                                                                                                                               |
| Full-length sgRNA         | Cryo-EM and gene editing in cells | GGGAUUCGUCGGUUCAGCGACGAUAAGCC<br>GAGAAGUGCCAAUAAAACUGUUAAGUGGU<br>UUGGUAACGCUCGGUAAGGUAGCCAAAAG<br>GCUGAAACUCCGUGCACAAAGACCGCACGG<br>ACGCUUCACAUUAGCUCAUAAACAAGGG<br>UUUGCGAGCUAGCUUGUGGAGUGUGAACN<br>NNNNNNNNNNNNNNNNNNNNNN |
| sgRNA-v2                  | Gene editing in cells             | GGGAUUCGUCGGUUCAGCGACGAUAAGCC<br>GAGAAGUGCCAAUAAAACUGUUAAGUGGU<br>UUGGUAACGCUCGGUAAGGUAGCCUUCGG<br>GCAAGACCACUGAACNNNNNNNNNNNNNNNN<br>NNNNNN                                                                                 |

/5Phos/ indicates 5' phosphorylation. Asterisks indicate phosphorothioate linkages.

**Supplementary Table 2. Cas12f target sequences.**

| <b>Target name</b> | <b>Sequence (5' to 3')</b> | <b>Assay</b> | <b>5' PAM</b> |
|--------------------|----------------------------|--------------|---------------|
| <i>HBB</i>         | GTAGCAATTTGTACTGATGG       | CRISPRa      | TTTA          |
| <i>HBG</i>         | CATTGAGATAGTGTGGGGAA       | CRISPRa      | TTTG          |
| <i>IL1RN</i>       | GTTTCTGCTAGCCTGAGTCA       | CRISPRa      | TTTG          |
| <i>APOB</i>        | CTGTCGACACCCAGAATCAT       | DNA Cleavage | TTTG          |
| <i>CARS</i>        | CAACAGCCTCACCAGGAACA       | DNA Cleavage | TTTA          |
| <i>CLTA4</i>       | CCTGGAGATGCATACTCACA       | DNA Cleavage | TTTG          |
| <i>DNMT1</i>       | TGTGGCCACAAGGCTCAGTT       | DNA Cleavage | TTTG          |
| <i>HEXA</i>        | AGTATACGCTTCCACAGAAA       | DNA Cleavage | TTTG          |
| <i>INIP</i>        | AGAGCAGCGATTGTAAGGAG       | DNA Cleavage | TTTA          |
| <i>MRPL39</i>      | ATTTACAGGACTTTGTAA         | DNA Cleavage | TTTA          |
| <i>NOTCH1</i>      | GCATCAGCTGGCACTCGTCC       | DNA Cleavage | TTTG          |
| <i>PDCD1</i>       | CTGTGAGCTCTAGTCCCCAC       | DNA Cleavage | TTTG          |
| <i>POLRMT</i>      | AGGACTATGTGTGGCCAGTG       | DNA Cleavage | TTTA          |
| <i>PRNP</i>        | TGGCCACATGGAGTGACCTG       | DNA Cleavage | TTTG          |
| <i>TP53-1</i>      | AGGCATCACTGCCCCCTGAT       | DNA Cleavage | TTTG          |
| <i>TP53-2</i>      | ATAAGAGGTCCCAAGACTTA       | DNA Cleavage | CTTG          |
| <i>TP53-3</i>      | CTTACCTCGCTTAGTGCTCC       | DNA Cleavage | CTTG          |
| <i>TP53-4</i>      | CCTCTTTCCTAGCACTGCC        | DNA Cleavage | CTTG          |
| <i>VEGFA-1</i>     | CTCTCAAGACCCACAATCCA       | DNA Cleavage | TTTG          |
| <i>VEGFA-2</i>     | AAGAAGGGATGTGGTGCATT       | DNA Cleavage | ATTG          |

**Supplementary Table 3. Cas12a target sequences.**

| <b>Target name</b> | <b>Sequence (5' to 3')</b> | <b>Assay</b> | <b>5' PAM</b> |
|--------------------|----------------------------|--------------|---------------|
| <i>HBB</i>         | GTAGCAATTTGTA CTGATGGTAT   | CRISPRa      | TTTA          |
| <i>HBG</i>         | CATTGAGATAGTGTGGGGAAGGG    | CRISPRa      | TTTG          |
| <i>IL1RN</i>       | GTTTCTGCTAGCCTGAGTCACCC    | CRISPRa      | TTTG          |
| <i>APOB</i>        | CTGTCGACACCCAGAATCATGGC    | DNA Cleavage | TTTG          |
| <i>CARS</i>        | CAACAGCCTCACCAGGAACAAGG    | DNA Cleavage | TTTA          |
| <i>CLTA4</i>       | CCTGGAGATGCATACTCACACAC    | DNA Cleavage | TTTG          |
| <i>DNMT1</i>       | TGTGGCCACAAGGCTCAGTTCTC    | DNA Cleavage | TTTG          |
| <i>HEXA</i>        | AGTATACGCTTCCACAGAAAGGA    | DNA Cleavage | TTTG          |
| <i>INIP</i>        | AGAGCAGCGATTGTAAGGAGAGG    | DNA Cleavage | TTTA          |
| <i>MRPL39</i>      | ATTTACAGGACTTTGTAAAGG      | DNA Cleavage | TTTA          |
| <i>NOTCH1</i>      | GCATCAGCTGGCACTCGTCCACA    | DNA Cleavage | TTTG          |
| <i>PDCD1</i>       | CTGTGAGCTCTAGTCCCCACTGT    | DNA Cleavage | TTTG          |
| <i>POLRMT</i>      | AGGACTATGTGTGGCCAGTGAGG    | DNA Cleavage | TTTA          |
| <i>PRNP</i>        | TGGCCACATGGAGTGACCTGGGC    | DNA Cleavage | TTTG          |
| <i>TP53-1</i>      | AGGCATCACTGCCCCCTGATGGC    | DNA Cleavage | TTTG          |
| <i>TP53-2</i>      | ATAAGAGGTCCCAAGACTTAGTA    | DNA Cleavage | CTTG          |
| <i>TP53-3</i>      | CTTACCTCGCTTAGTGCTCCCTG    | DNA Cleavage | CTTG          |
| <i>TP53-4</i>      | CCTCTTTCCTAGCACTGCCAAC     | DNA Cleavage | CTTG          |
| <i>VEGFA-1</i>     | CTCTCAAGACCCACAATCCAGGC    | DNA Cleavage | TTTG          |
| <i>VEGFA-2</i>     | AAGAAGGGATGTGGTGCATTTGG    | DNA Cleavage | ATTG          |

**Supplementary Table 4. Cas9 target sequences.**

| <b>Target name</b> | <b>Sequence (5' to 3')</b> | <b>Assay</b> | <b>3' PAM</b> |
|--------------------|----------------------------|--------------|---------------|
| <i>HBB</i>         | AGCAATTTGTACTGATGGTA       | CRISPRa      | TGG           |
| <i>HBG</i>         | CATTGAGATAGTGTGGGGAA       | CRISPRa      | GGG           |
| <i>ILIRN</i>       | GCTAGCCTGAGTCACCCTCC       | CRISPRa      | TGG           |
| <i>CARS</i>        | CAACAGCCTCACCAGGAACA       | DNA Cleavage | AGG           |
| <i>HEXA</i>        | GAGTATACGCTTCCACAGAA       | DNA Cleavage | AGG           |
| <i>INIP</i>        | AGAGCAGCGATTGTAAGGAG       | DNA Cleavage | AGG           |
| <i>PDCD1</i>       | TGTCTTGCTGGAAAATGTGG       | DNA Cleavage | AGG           |
| <i>POLRMT</i>      | AGGACTATGTGTGGCCAGTG       | DNA Cleavage | AGG           |
| <i>TP53-1</i>      | ATGGCAAATGCCCAATTGC        | DNA Cleavage | AGG           |
| <i>VEGFA-1</i>     | GACCCAGAGATGCATAAAAC       | DNA Cleavage | AGG           |
| <i>VEGFA-2</i>     | AAGAAGGGATGTGGTGCATT       | DNA Cleavage | TGG           |

**Supplementary Table 5. Cryo-EM data collection, refinement, and validation statistics.**

|                                                  | AsCas12f-gRNA-DNA complex<br>(EMDB-27801)<br>(PDB 8DZJ) |
|--------------------------------------------------|---------------------------------------------------------|
| <b>Data collection and processing</b>            |                                                         |
| Magnification                                    | 81,000                                                  |
| Voltage (kV)                                     | 300                                                     |
| Electron exposure (e-/Å <sup>2</sup> )           | 50                                                      |
| Defocus range (µm)                               | -1.0 to -2.5                                            |
| Pixel size (Å)                                   | 0.5323                                                  |
| Symmetry imposed                                 | C1                                                      |
| Initial particle images (no.)                    | 5,285,777                                               |
| Final particle images (no.)                      | 490,190                                                 |
| Map resolution (Å)                               | 2.9                                                     |
| FSC threshold                                    | 0.143                                                   |
| Map resolution range (Å)                         | 2.7 to 7.1                                              |
| <b>Refinement</b>                                |                                                         |
| Model resolution (Å)                             | 3.1                                                     |
| FSC threshold                                    | 0.5                                                     |
| Map sharpening <i>B</i> factor (Å <sup>2</sup> ) | -78.8                                                   |
| Model composition                                |                                                         |
| Non-hydrogen atoms                               | 9030                                                    |
| Protein residues                                 | 613                                                     |
| Nucleotide                                       | 190                                                     |
| Ligands                                          | Zn: 1                                                   |
| <i>B</i> factors (Å <sup>2</sup> )               |                                                         |
| Protein                                          | 19.0                                                    |
| Nucleotide                                       | 46.3                                                    |
| Ligand                                           | 57.1                                                    |
| R.m.s. deviations                                |                                                         |
| Bond lengths (Å)                                 | 0.003                                                   |
| Bond angles (°)                                  | 0.603                                                   |
| Validation                                       |                                                         |
| MolProbity score                                 | 1.61                                                    |
| Clashscore                                       | 12.59                                                   |
| Poor rotamers (%)                                | 0.38                                                    |
| Ramachandran plot                                |                                                         |
| Favored (%)                                      | 98.41                                                   |
| Allowed (%)                                      | 1.49                                                    |
| Disallowed (%)                                   | 0.00                                                    |

**Supplementary Table 6. Numbers of potential off-target sites predicted by Cas-OFFinder for all AsCas12f targets.**

| <b>Rank</b> | <b>Target site</b> | <b>Number of potential off-target sites</b> |
|-------------|--------------------|---------------------------------------------|
| 1           | <i>MRPL39</i>      | 1538095                                     |
| 2           | <i>TP53-2</i>      | 1113028                                     |
| 3           | <i>APOB</i>        | 898574                                      |
| 4           | <i>HEXA</i>        | 771008                                      |
| 5           | <i>PDCD1</i>       | 551945                                      |
| 6           | <i>INIP</i>        | 537243                                      |
| 7           | <i>NOTCH1</i>      | 505045                                      |
| 8           | <i>PRNP</i>        | 503098                                      |
| 9           | <i>CLTA4</i>       | 479644                                      |
| 10          | <i>CARS</i>        | 461355                                      |
| 11          | <i>POLRMT</i>      | 444226                                      |
| 12          | <i>VEGFA-2</i>     | 404473                                      |
| 13          | <i>VEGFA-1</i>     | 373137                                      |
| 14          | <i>TP53-1</i>      | 348930                                      |
| 15          | <i>DNMT1</i>       | 334536                                      |
| 16          | <i>TP53-3</i>      | 325648                                      |
| 17          | <i>TP53-4</i>      | 240052                                      |

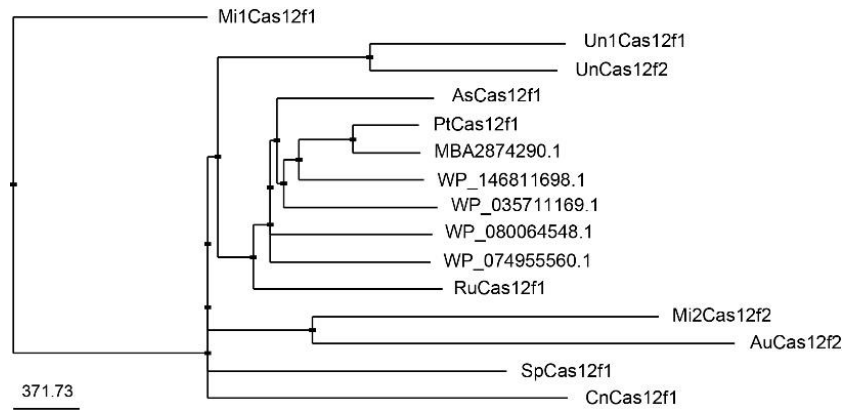

**Supplementary Fig. 1** | Phylogenetic tree of Cas12f family proteins. Hypothetical proteins are denoted by Genbank protein accession numbers.



```

AsCas12f1/1-422          1 M I ----- K V Y R Y E I V K P L ----- D L ----- 15
Un1Cas12f1/1-529       1 M A K N - T I T K T L K L R I V R P Y ----- N S A E V E K I V A D E K N N R E K I A L E K N K D K V K 47
UnCas12f2/1-500        1 M E V Q K T V M K T L S L R I L R P L ----- Y S Q E I E K E I K E E K E R R K Q A G ----- 39
PtCas12f1/1-424        1 M K Y ----- T K V M R Y Q I I K P L ----- N A ----- 17
RuCas12f1/1-440        1 M V ----- K V V K I H L I S E Q F D K A G N R I ----- 21
MBA2874290.1/1-424     1 M K Y ----- T K V M R Y Q I I K P L ----- N A ----- 17
WP_146811698.1/1-422   1 M K H ----- T K V M R Y Q I I K P L ----- N D ----- 17
WP_035711169.1/1-424   1 M K ----- K T V R L Q I V K P M ----- D E ----- 15
WP_080064548.1/1-424   1 M A ----- T K V M R Y Q I I K P L ----- D C ----- 16
WP_074955560.1/1-428   1 M K L ----- V K T M R Y Q I I K P L ----- S C ----- 17

AsCas12f1/1-422        16 ----- D W K E F G T I 23
Un1Cas12f1/1-529       48 E A C S K H L K V A A Y C T T Q V E R N A C L F C K A R K L D D K F Y Q K L R G Q F P D A V F W Q E I S E I 101
UnCas12f2/1-500        40 ----- G T G E L D G G F Y K K L E K K H S E M F S F D R L N L L 68
PtCas12f1/1-424        18 ----- E W D E L G M V 25
RuCas12f1/1-440        22 ----- D Y E E V N K I 29
MBA2874290.1/1-424     18 ----- E W D E L G M V 25
WP_146811698.1/1-422   18 ----- T W E T L G H V 25
WP_035711169.1/1-424   16 ----- D W E I L G R V 23
WP_080064548.1/1-424   17 ----- N W D L F G K V 24
WP_074955560.1/1-428   18 ----- D W D T L G T V 25

AsCas12f1/1-422        24 L R Q L Q Q E T R F A L N K A T - Q L A W E W M G F S S D Y K D N H G E Y P K S K --- D I L G Y T N V H 72
Un1Cas12f1/1-529       102 F R Q L Q K Q A A E I Y N Q S L I E L Y Y E I F ----- I K G K --- G I A N A S S V E 138
UnCas12f2/1-500        69 L N Q L Q R E I A K V Y N H A I - S E L Y I A T ----- I A Q G N K S N K H Y I S S I V Y N R A Y 112
PtCas12f1/1-424        26 L R D I Q K E T R A A L N K T I - Q L C W E Y Q G F S A D Y K Q I H G Q Y P K P K --- D V L G Y T S M H 74
RuCas12f1/1-440        30 L W E L Q K Q T R E A K N K T V - Q L L W E W N N F S S D Y V K A S G I Y P K A K --- D I F G Y S S V H 78
MBA2874290.1/1-424     26 L R D I Q K E T R A A L N K T I - Q L C W E Y Q G F S A D Y K Q I H G Q Y P K P K --- D V L R Y T S M H 74
WP_146811698.1/1-422   26 L R E I Q R E T R A A L N K T I - Q L A W E W Q G F S A E Y K Q R Y E E Y P K T K --- D H L G Y S A L H 74
WP_035711169.1/1-424   24 L H D I R Y Q T R Q V L N K T I - Q L C W E Y S N F S S E Y K A L H G D Y P K N K --- E I L H Y T S M H 72
WP_080064548.1/1-424   25 L R D I Q Y D T R Q I M N R T I - Q Y C W E W Q G Y S S D Y K I A K G E Y P K T R --- E T F G Y S D M R 73
WP_074955560.1/1-428   26 L R E L Q R D T H S V L N K T I - Q L C W E W Q G Y S E Y K A A N G T Y P T P K --- D T L G R - S L E 73

AsCas12f1/1-422        73 G Y A Y H T I K T K A Y R L N S G N L S Q T I K R A T D R F K A Y Q K E I L R G D M S I P S Y K R D - I P L 125
Un1Cas12f1/1-529       139 H Y L S D V C Y T R A A E L F K N A A I A S G L R S K I K S N F R L K E L K N M K S G L P T T K S D N F P I 192
UnCas12f2/1-500        113 G Y F Y N A ----- Y I A L G I C S K V E A N F R S N E L L T Q Q S A L P T A K S D N F P I 154
PtCas12f1/1-424        75 G Y A Y D R L K N E F S K I A S S N L S Q T I K R A V D K W N S D L K E I L R G D R S I P N F R K D - C P I 127
RuCas12f1/1-440        79 G Q A N K E L R T K L - A L N S S N L S T T M D V C K N F N T Y K K E V W K G K R S V P S Y K S D - Q P L 130
MBA2874290.1/1-424     75 G Y A Y K H L K N E F S K I A S A N L A Q T I K R A V D K W N S D L K E I L R G D R S I P N F R K D - C P I 127
WP_146811698.1/1-422   75 G Y A Y N R L K D E F Y R M N T A N L S Q T V K R A A D K W K S D L K D V L R G D K S I A S F K K D - C P I 127
WP_035711169.1/1-424   73 G Y A Y N Q L K E Q Y Y Y I Q S G N C S Q T V K R A V D K W K S D L K E I L R G D R S I P S Y K K D - I P I 125
WP_080064548.1/1-424   74 G Y A Y D K L K S I Y Q R L N T A N L T T S I T R A V Q R W K T D T K D V I R G D K S I A C F R A D - V P I 126
WP_074955560.1/1-428   74 G Y V Y D R L K V Q F P K M Y T P N L S Q T I Q R A M L K W S A D S K A I F K G E V S I P S Y K K D - V P L 126

AsCas12f1/1-422        126 D L I K E N ----- I S V N R M - N H G D Y I A S L S L L S N P A K Q E M N V K R K - - I - S V I - 166
Un1Cas12f1/1-529       193 P L V K Q K G G Q - - Y T G F E I S N H - - N S D F I I K I P F G R W Q V K K E I D K Y R P W E K F D F E Q 242
UnCas12f2/1-500        155 V L H K Q K G A E G E D G G F R I S T E - - G S D L I F E I P I P F Y E Y N G E N R - K E P Y K - - - W V 201
PtCas12f1/1-424        128 D I V K Q S ----- T K I Q K C - - N D G Y V L S L G L I N R E Y K N E L G R K N G - - V F D V L - 168
RuCas12f1/1-440        131 D L H K D S ----- I K L I Y E - - N N E F Y V R L A L L K K A E F A K Y G F K D G - - F R F K - 170
MBA2874290.1/1-424     128 D I V K Q S ----- T K I Q K C - - N D G Y V L S L G L I N R E Y K N E L G R K N G - - V F D V L - 168
WP_146811698.1/1-422   128 D I V S Q A ----- L R I R K D - - G S D Y I M T L S L V S I K Y R K E L E R K Q S - - F F D V L - 168
WP_035711169.1/1-424   126 D I V K D A ----- V S L E H D E K N G N Y I A T L S L M S T A Y R K E M E R K S G - - Q F R V L - 168
WP_080064548.1/1-424   127 D L H N K S ----- M N I E K S - - D D G Y I V A L S L A S N I Y K K E L D R N S G - - Q F S V L - 167
WP_074955560.1/1-428   127 D L R K D S ----- I H I E R R - - G H D Y I L S L G L V S R A Y K K E L G L P E C - - Q I E V L - 167

AsCas12f1/1-422        167 ----- I I V - R G A G K T I M D R I L S G E Y Q V S A S Q I I H D - - 195
Un1Cas12f1/1-529       243 V Q K S P K P I - S L L L S T Q R R K R N K G W S K D E G T E A E I K K V M N G D Y Q T S Y I E V K R G S K 295
UnCas12f2/1-500        202 K K G G Q K P V L K L I L S T F R R Q R N K G W A K D E G T D A E I R K V T E G K Y Q V S Q I E I N R G K K 255
PtCas12f1/1-424        169 ----- I K A N D K T Q Q T I L E R I I N G D Y T Y T A S Q I I N - - - 197
RuCas12f1/1-440        171 ----- M Q V K D N S T K T I L E R C F D E V Y K I N A S K L L Y D - - 200
MBA2874290.1/1-424     169 ----- I K A N D K T Q Q T I L E R I I N G D Y T Y T A S Q I I N - - - 197
WP_146811698.1/1-422   169 ----- I S A N D K T Q R D I L D R L I A G E Y K L G A S Q L L Y - - - 197
WP_035711169.1/1-424   169 ----- L H S G D N S K K T I L K R L V Q G E Y Q H T A S Q I V K - - - 197
WP_080064548.1/1-424   168 ----- I N E G N K S N R D V L D R C I A G O Y K I S A S Q I L R - - - 196
WP_074955560.1/1-428   168 ----- I G T P D K T Q R V I L A R L L T G E Y T V S G S Q I V W D - - 197

```

|                      |     |                                                          |     |
|----------------------|-----|----------------------------------------------------------|-----|
| AsCas12f1/1-422      | 196 | -DRKKNKWLNLNLSYDFEPQT-RVLDLNKIMGIDLVAVAVYMAFQ-HTPARYKLE  | 246 |
| Un1Cas12f1/1-529     | 296 | IGEKSAWMLNLSIDVPKID-KGVDPSILGGIDVGVKSPLVCAIN-NAFSRYSIS   | 347 |
| UnCas12f2/1-500      | 256 | LGESHQKWFANFSIEQPIYE-RKPNRSIVGGLDVGIRSPLVCAIN-NSFSRYSVD  | 307 |
| PtCas12f1/1-424      | 198 | --HKNKWFINLTYQFETKE-TALDPNNVMGVDLGIVYPVYIAFN-NSLHRYHIK   | 247 |
| RuCas12f1/1-440      | 201 | -QKKKWKLNLSYSFDNKNISELDKEKILGVVDVGVNCPLVASVF-GDRDRFIK    | 252 |
| MBA2874290.1/1-424   | 198 | --HKNKWFINLTYQFEAKE-AAALDPNNVMGVDLGIVYPVYIAFN-NSLHRYHIK  | 247 |
| WP_146811698.1/1-422 | 198 | --HKKKWFVNVNYYQFEKEE-TAFDQDNIMGVDLGVYPVYMAFN-NSLNRYKIE   | 247 |
| WP_035711169.1/1-424 | 198 | --KGKKWFLNLSYKFDVLQ-TPFQTERVMGVDMGVYIPIYMAFNHYHDHLRYKIQ  | 248 |
| WP_080064548.1/1-424 | 197 | --EKKNKWFNLNLSYSFEISK-PDKSRDNLGIDVGVIVHPVYMAVY-NSPARRSIS | 246 |
| WP_074955560.1/1-428 | 198 | -KRNRKWFVNLAYHFEARP-EQLDKTKILGVDLGVVFPVYMAVA-DGHFRAGIP   | 248 |
| AsCas12f1/1-422      | 247 | GGEIEINFRRQVESRRISMLRQKYGAGGARGGHGRDKRIKPIEQLRDKIANFRDT  | 300 |
| Un1Cas12f1/1-529     | 348 | DNDLFHFHFKMFAARRILLKKNRH---KRAGHGAKNKLKPIITILTEKSERFRKK  | 398 |
| UnCas12f2/1-500      | 308 | SNDVFKFSKQVFAFRRLLSKNSL---KRKGHGAHAKLEPITEMTEKNDKFRKK    | 358 |
| PtCas12f1/1-424      | 248 | GGEIERFRRQVEKRRKRELLNQGKYCGDGRKGGHYATRTKSIESISDKIARFRDT  | 301 |
| RuCas12f1/1-440      | 253 | GGEIEKFRKSVARRRSMLEQTKYCGDGRIGHGRKKRTEPALNIGDKIARFRDT    | 306 |
| MBA2874290.1/1-424   | 248 | GGEIERFRRQVEKRRKRELLNQGKYCGDGRKGGHYATRTKSIELISDKIARFRDT  | 301 |
| WP_146811698.1/1-422 | 248 | GGEIERFRAQVERRKKQLLQQAQKYGRRGHGTKTRIQPIEVVSDKIVANFRDT    | 301 |
| WP_035711169.1/1-424 | 249 | GGEIERFRRQVESRKKALQDQKYGSGRVGHGTKTRIDPLEVIRDKIANFRDT     | 302 |
| WP_080064548.1/1-424 | 247 | GGEIDNFRKQVQKRIKELQLQKCGEGRIGHGKTRVKKPIEFAKDKIVANFRDT    | 300 |
| WP_074955560.1/1-428 | 249 | GGEIEEFRRRVEARRRQLLRQKYGCGDGRIGHGRATRTRPLDKIADKIARFRDT   | 302 |
| AsCas12f1/1-422      | 301 | TNHRYSRYIVDMAIKEGCGTIQMEDLTNIRDIGSRFL-----QNWTYYDLQKKI   | 349 |
| Un1Cas12f1/1-529     | 399 | LIERWACEIADFFIKNKVGTQOMENLESMKRKEDSYFNIRLGRGFWPYAEMQNKI  | 452 |
| UnCas12f2/1-500      | 359 | IIERWAKEVTNFFVKNQVGIQIJDLSMTKDRDHFNFNYLRGFWPYYQMQLTI     | 412 |
| PtCas12f1/1-424      | 302 | CNHKYSRFIVDMALKHNCGIQMEDLTGISK-ESTFL-----KNWTYYDLQKKI    | 349 |
| RuCas12f1/1-440      | 307 | TNHKYSRALIEYAVKKGCGTIQMEKLTGITSKSDRFL-----KDWTYYDLQTKI   | 355 |
| MBA2874290.1/1-424   | 302 | CNHKYSRFIVDMALKHNCGIQMEDLTGISK-ESTFL-----KNWTYYDLQKKI    | 349 |
| WP_146811698.1/1-422 | 302 | VNHRYSRYVVDMAIKHRCGTIQMEDLSGIAA-EDTFL-----KRWSYYDLQKKI   | 349 |
| WP_035711169.1/1-424 | 303 | KNHYSRYVVDMAEKHECATIQLEELKGIHQ-DDAFL-----KRWSYHDLQEKI    | 350 |
| WP_080064548.1/1-424 | 301 | INHYSRYKAVVEFAIKNGCGIQMEDLKGINT-DNVFL-----KNWTYYDLQKQV   | 348 |
| WP_074955560.1/1-428 | 303 | INHYSRYVYVETARKLGCQVIQMEDLTGIRE-ENLFL-----ANWPHYDLQRKI   | 350 |
| AsCas12f1/1-422      | 350 | IYKAE EAGIKV IKIDPQYTSQRCS E--CGNIDSGN-----RIGQAIFKCRACG | 395 |
| Un1Cas12f1/1-529     | 453 | EFKLKQYGI ERKVPNNTSKTCSK--CGHLNNYFNFEYRKKNKFPFKCEKCN     | 504 |
| UnCas12f2/1-500      | 413 | ENKLEKYGIEVKKRVQAKYTSQLCSNPNCRYWNNYFNFEYRKKVKNKFPFKCEKCN | 466 |
| PtCas12f1/1-424      | 350 | EYKAREAGIQVIKIEPQYTSQRCSK--CGYIDKEN-----RQEATFKCIECG     | 395 |
| RuCas12f1/1-440      | 356 | ENKAKEVGINVVYIAPKYTSQRCSK--CGYIHKDN-----RPNQAKFRCLCED    | 401 |
| MBA2874290.1/1-424   | 350 | EYKAREAGIQVIKIEPQYTSQRCSK--CGYIDKEN-----RQEATFKCIECG     | 395 |
| WP_146811698.1/1-422 | 350 | EYKAKEAGIQVYIKPDYTSQRCSK--CGHIERDN-----RTEQATFECKSCG     | 395 |
| WP_035711169.1/1-424 | 351 | TYKAE EKG IQVIKVDPPQKTSQRCHH--CGNIDSN-----RKEQASFLCTSCG  | 396 |
| WP_080064548.1/1-424 | 349 | KYKAELEGIEVKLIDPQYTSQRCSK--CGYIHRDN-----RPEQAKFKCIDCG    | 394 |
| WP_074955560.1/1-428 | 351 | EYKAREYGI EYRVPQYTSQRCS D--CGYIHPDN-----RPEQAKFRCLACG    | 396 |
| AsCas12f1/1-422      | 396 | YEANADYNAARNI AIPNIDKIIAES I-----K                       | 422 |
| Un1Cas12f1/1-529     | 505 | FKENADYNAALN ISNP K LKSTKEE-----P                        | 529 |
| UnCas12f2/1-500      | 467 | LEISADYNAARNLSTPDI EK FVAKATKGIN----LPE-K                | 500 |
| PtCas12f1/1-424      | 396 | FKTNADYNAARNI AIPNIDK IIRKTLKM-----Q                     | 424 |
| RuCas12f1/1-440      | 402 | FESNADYNASQNI GIKNIDK IIEKDLQKQES EVQV NENK              | 440 |
| MBA2874290.1/1-424   | 396 | FKTNADYNAARNI AIPNIDK IIRKTLKM-----Q                     | 424 |
| WP_146811698.1/1-422 | 396 | FKTNADFNAARNI ATKDIEKIIAETLK-----                        | 422 |
| WP_035711169.1/1-424 | 397 | METNADFNAAKNISIPGIEQIIQTEMK-----S                        | 424 |
| WP_080064548.1/1-424 | 395 | FEVNADYNASLNIATPDI DK ILEFLKCE-----T                     | 424 |
| WP_074955560.1/1-428 | 397 | FETNADYNAARNIATEGIEELIAAALNKAS----V--V                   | 428 |

**Supplementary Fig. 2 | Full sequence alignment of AsCas12f and other Cas12f family proteins.** The alignment was performed using the T-Coffee multiple sequence alignment program.

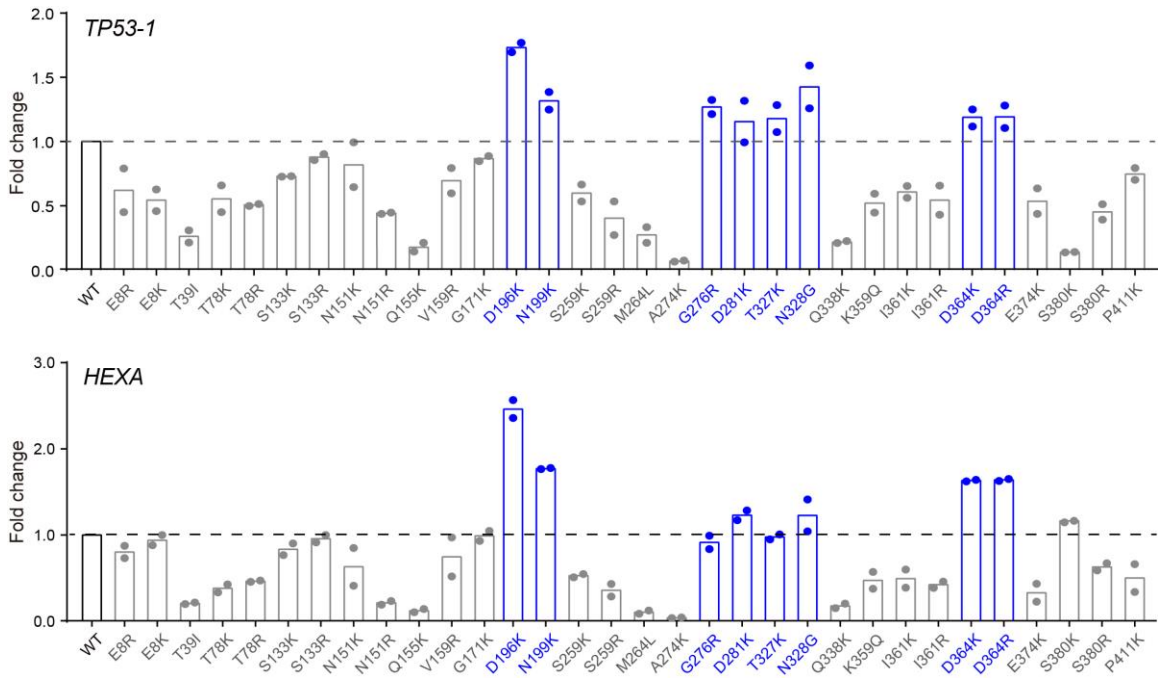

**Supplementary Fig. 3 | Gene-editing performance of AsCas12f variants that bear single-point mutations at *TP53-1* (top) and *HEXA* (bottom) loci in HEK293T cells. Fold changes are calculated relative to the indel levels mediated by the wild-type protein.**

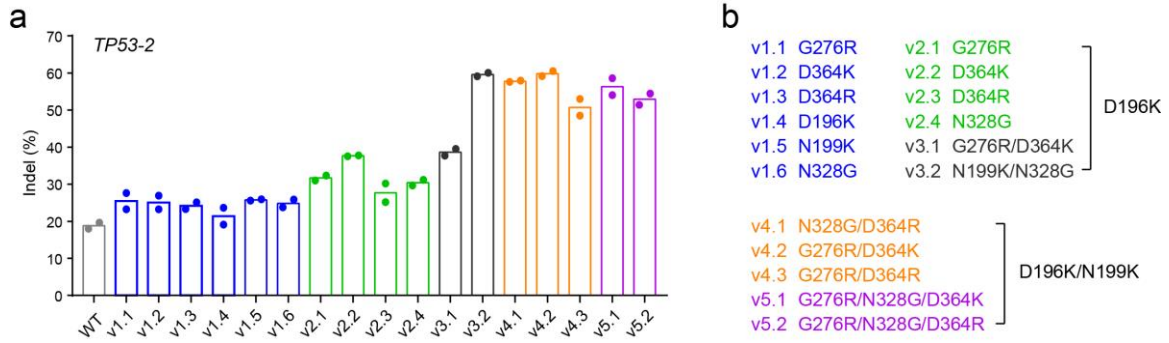

**Supplementary Fig. 4 | AsCas12f variants with increased gene-editing efficiency. a,** Indel level at the *TP53-2* locus generated by AsCas12 variants that bear one, two, three, four, or five single-point mutations. **b,** List of mutations included in each AsCas12f variant in (a) and Fig. 1 (d)-(e).

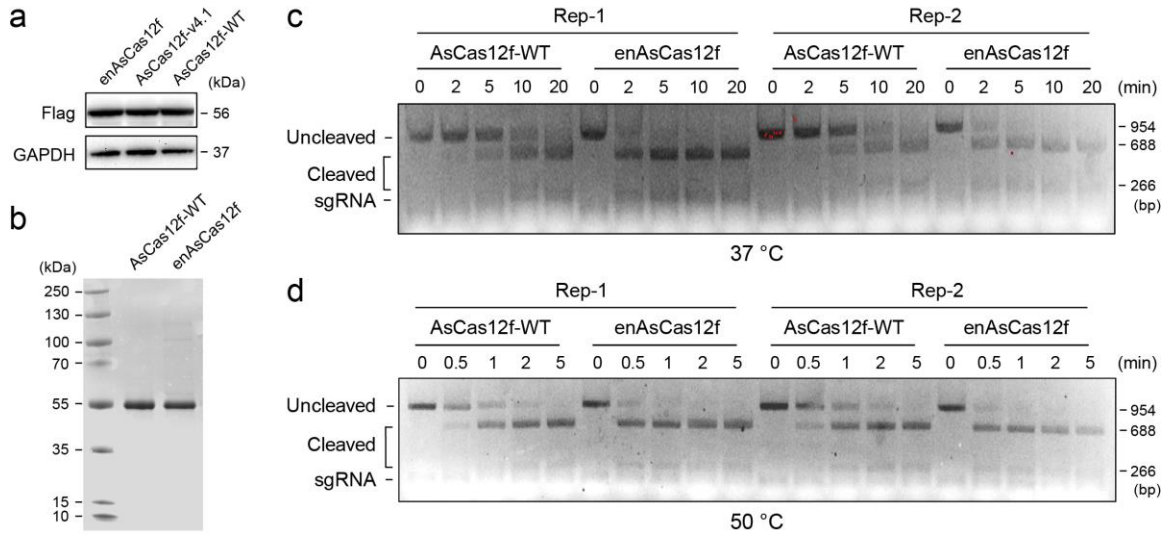

**Supplementary Fig. 5 | *In vitro* DNA cleavage by wild-type AsCas12f and enAsCas12f.**  
**a**, Western blot showing the protein level of Flag-tagged AsCas12f variants in HEK293T cells. **b**, SDS-PAGE analysis of wild-type AsCas12f and enAsCas12f proteins used for *in vitro* DNA cleavage experiments. **c**, **d**, Gel electrophoresis monitoring *in vitro* DNA cleavage by wild-type AsCas12f and enAsCas12f over time courses at 37 °C (**c**) and 50 °C (**d**). Expected DNA sizes are noted on the right of the gel images.

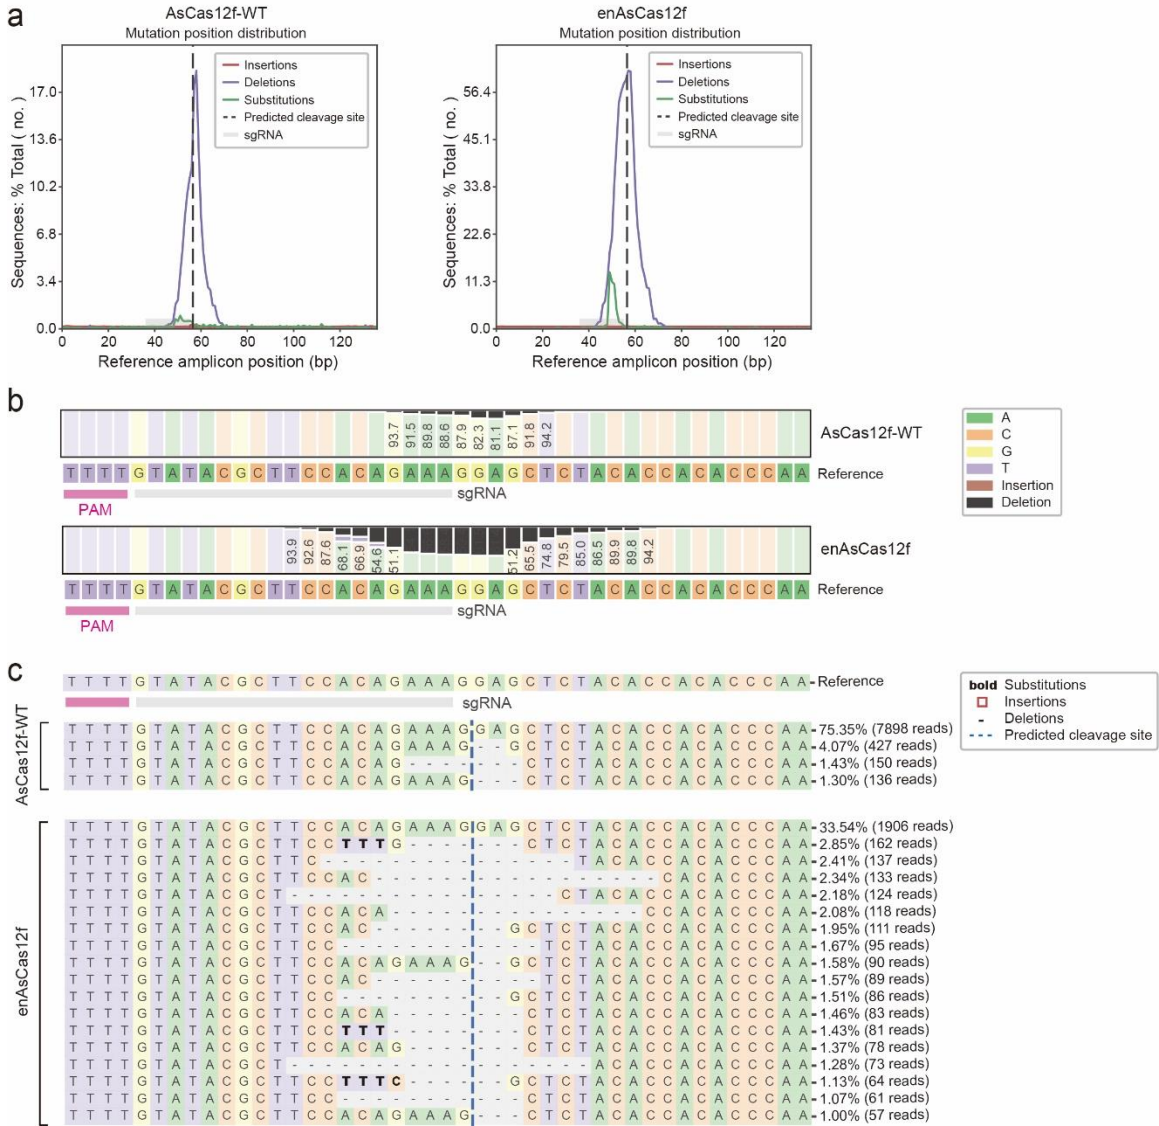

**Supplementary Fig. 6 | Representative deep sequencing data processed by CRISPEResso2 showing DNA-editing patterns generated by wild-type AsCas12f and enAsCas12f. a, Metaplots showing the positions of insertions, deletions, and substitutions from samples edited by wild-type AsCas12f (left) and enAsCas12f (right). b, Frequencies of insertions, deletions, and substitutions observed near the PAM sequence from samples edited by wild-type AsCas12f (top) and enAsCas12f (bottom). c, Raw sequencing reads from samples edited by wild-type AsCas12f (top) and enAsCas12f (bottom). Sequence variants with  $\geq 1\%$  of total reads are shown.**

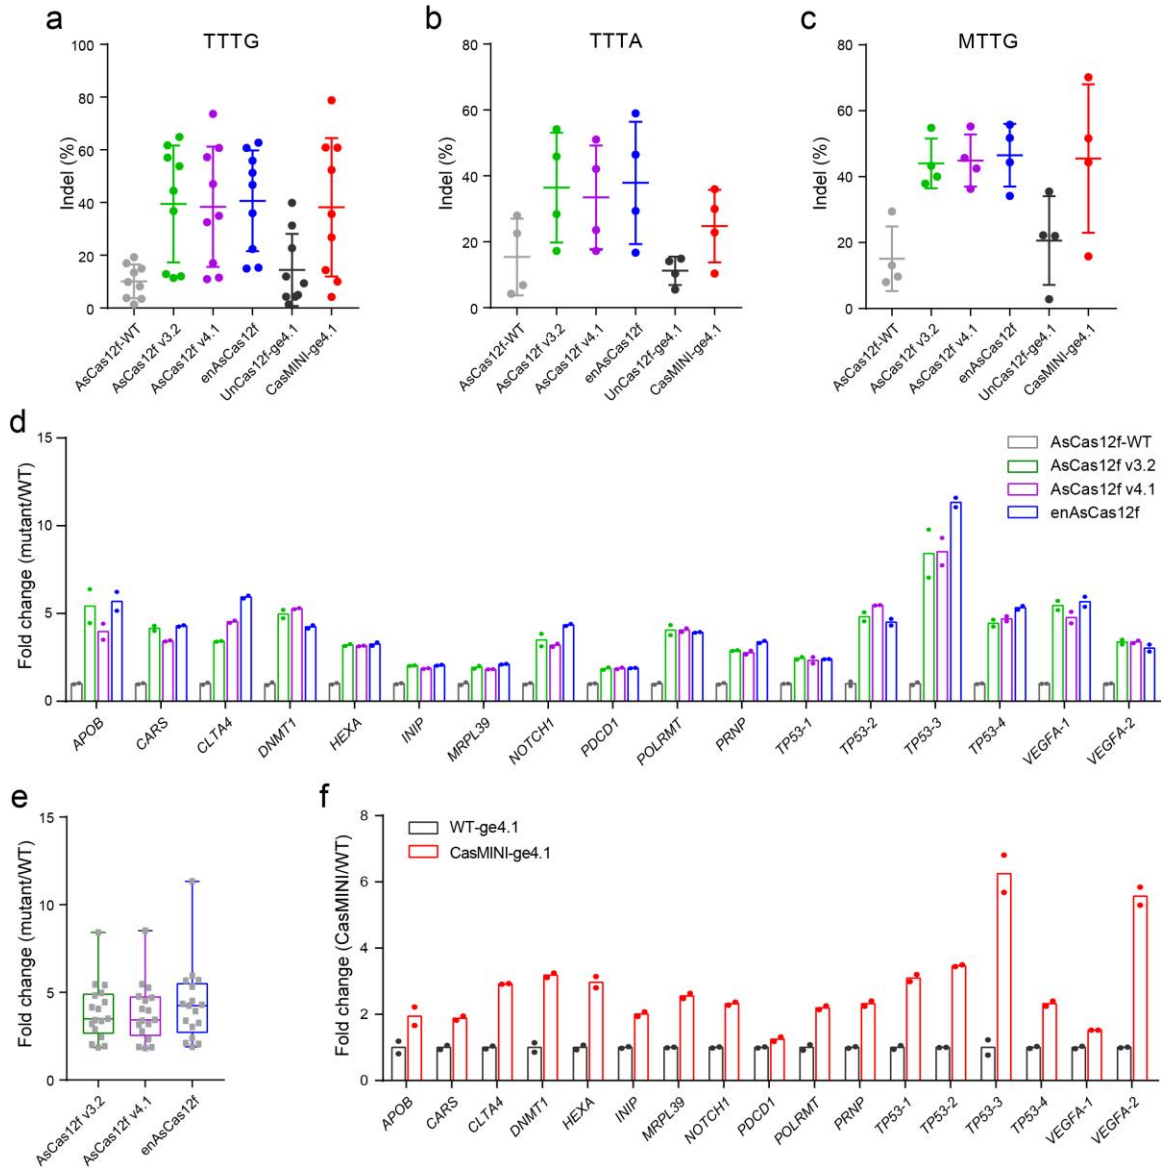

**Supplementary Fig. 7 | Performance of engineered AsCas12f across a wide range of target sites with different PAM sequences.** **a-c**, Frequencies of indels delivered by denoted AsCas12f and UnCas12f systems at sites of TTTG (**a**), TTTA (**b**), and MTTG (**c**) PAM sequences (M = A/C). n = 9 target sites for (**a**), n = 4 target sites for (**b**) and (**c**). Error bars represent mean  $\pm$ SD. **d**, Fold changes of indel frequencies generated by engineered AsCas12f variants compared to wild-type AsCas12f. **e**, Box-and-whisker plot showing fold change mediated by engineered AsCas12f variants. All data points (n = 17 target sites) were plotted, with the centerline showing the median and the whiskers showing the minimum to the maximum. The boundaries of the boxes indicate the 25th and 75th percentiles. **f**, Fold changes of indel frequencies generated by CasMINI compared to wild-type UnCas12f paired with ge4.1.

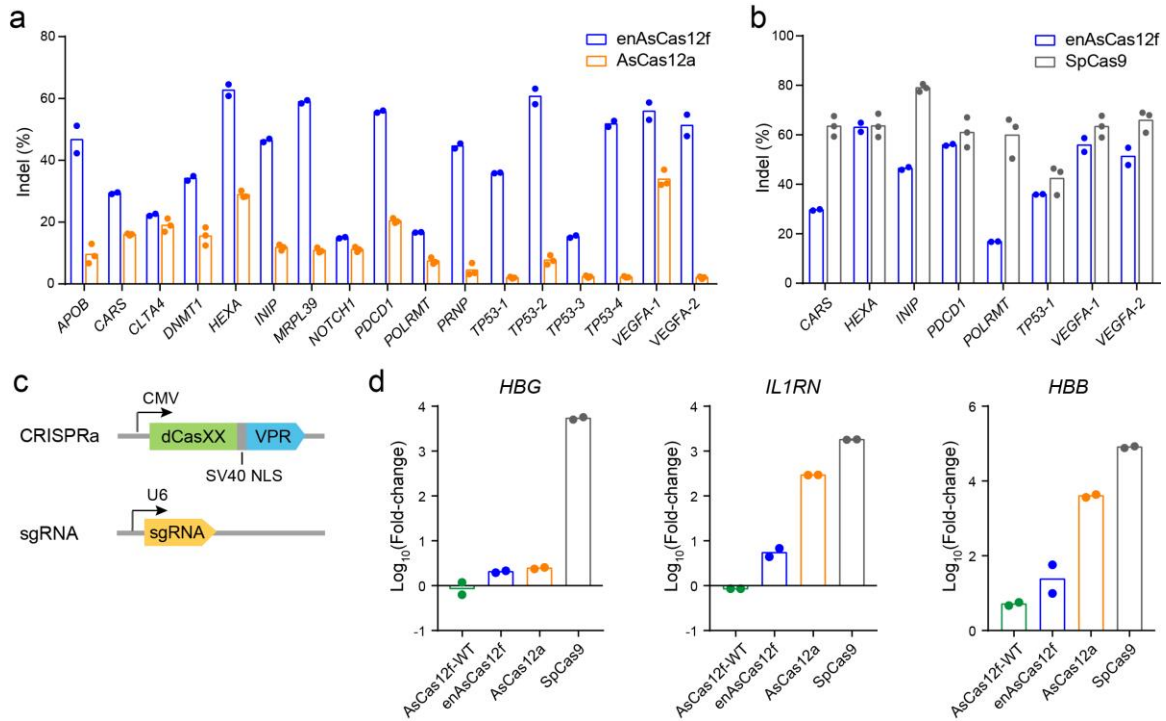

**Supplementary Fig. 8 | Comparison between enAsCas12f, AsCas12a, and SpCas9. a,** Indel frequencies mediated by enAsCas12f and AsCas12a in HEK293T cells. **b,** Indel frequencies mediated by enAsCas12f and SpCas9 in HEK293T cells. To satisfy different PAM requirements, SpCas9 sgRNAs for *PDCD1*, *TP53-1*, and *VEGFA-1* were designed to recognize sites proximal to the ones targeted by AsCas12f sgRNAs. **c,** Schematic construct design for CRISPRa mediated by different Cas proteins. **d,** Gene activation effects by different CRISPRa constructs in HEK293T cells. Transcription activation was measured by the relative RNA level of *HBG*, *IL1RN*, and *HBB* normalized to *GAPDH*. Fold changes are normalized to RNA levels in cells transfected with a non-target sgRNA.



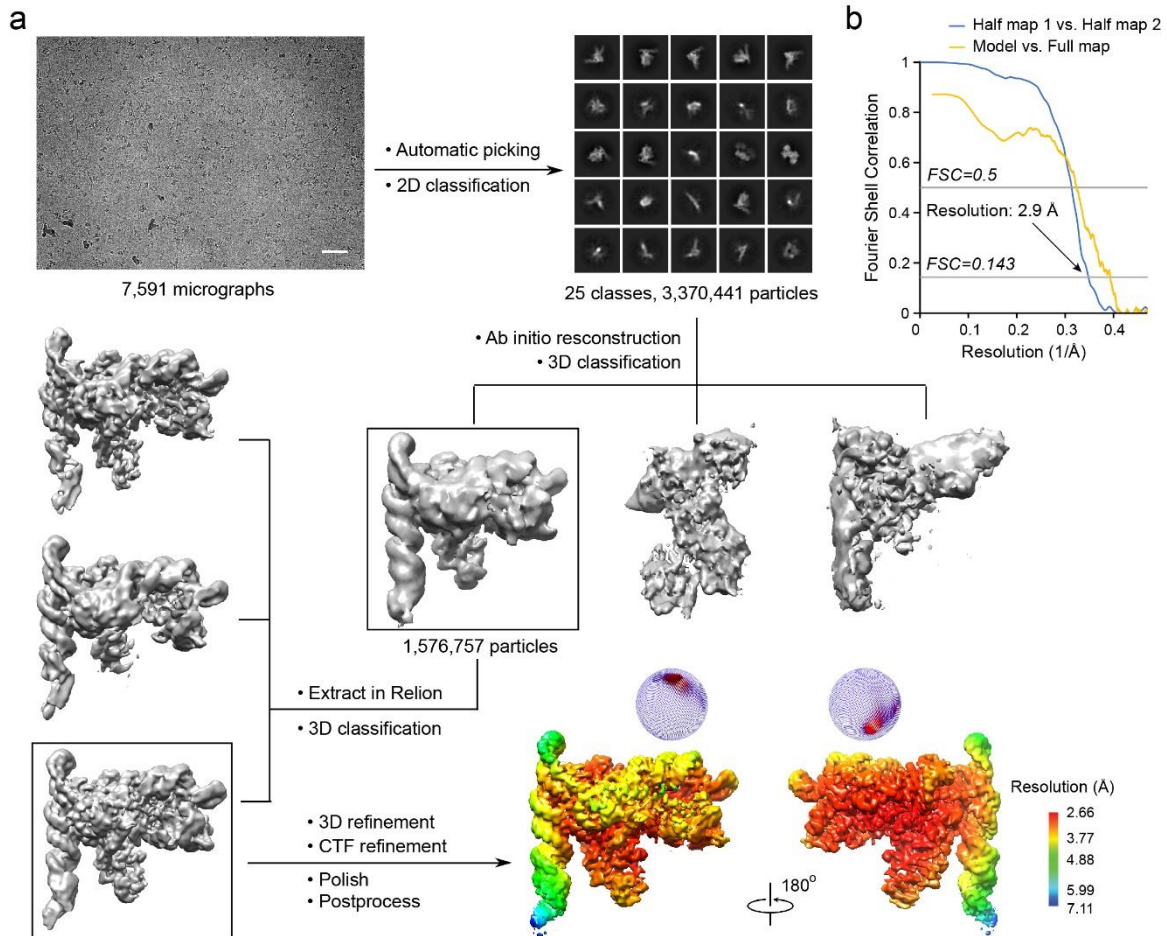

**Supplementary Fig. 9 | Single-particle cryo-EM analysis of the AsCas12f-gRNA-DNA complex.** **a**, Data processing workflow. A representative micrograph from 7,591 micrographs is shown along with a 50 nm scale bar. After the first heterogeneous refinement in CryoSPARC, the particles were exported to RELION for further processing. **b**, Fourier shell correlation curves of the half map 1 versus the half map 2 (blue), and the refined model versus the full map (yellow). The overall resolution of the reconstruction was estimated by the Fourier shell correlation (FSC) = 0.143 criterion.

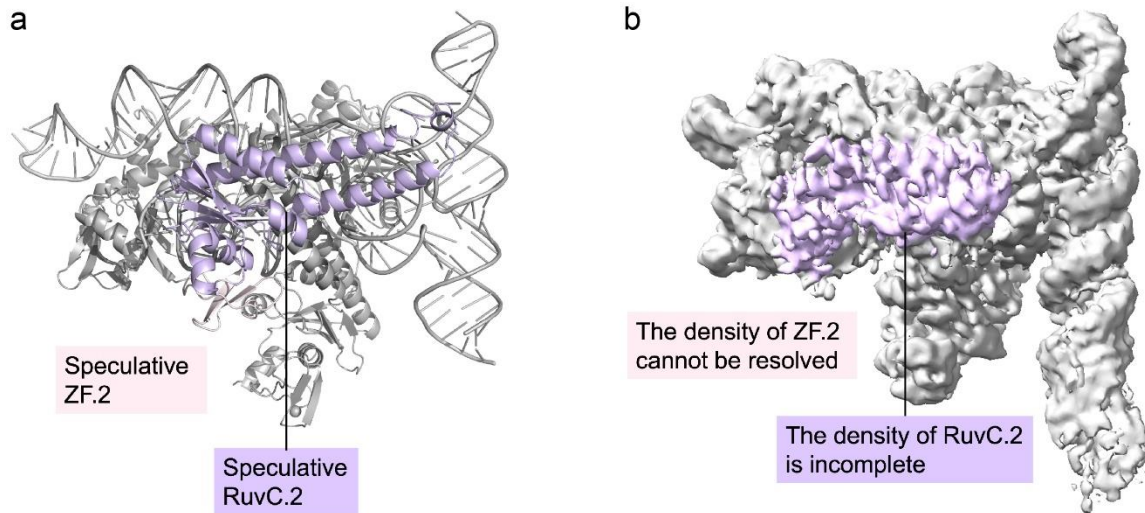

**Supplementary Fig. 10 | The C-lobe of AsCas12f.2 was not fully resolved. a,** The AsCas12f-sgRNA-DNA structure with speculative RuvC.2 and ZF.2 domains. **b,** Unsharpened AsCas12f-sgRNA-DNA cryo-EM map (contoured at a level of 0.01) with incomplete RuvC.2 domain density colored in light purple.

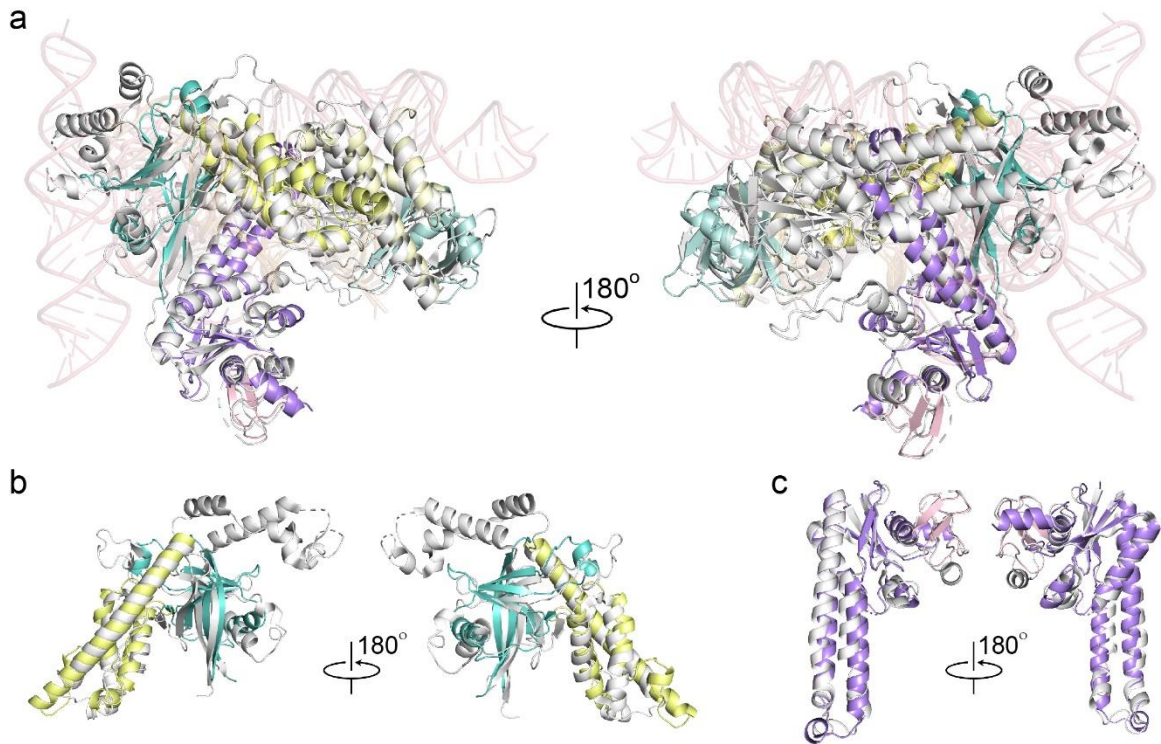

**Supplementary Fig. 11 | Comparison of the AsCas12f the UnCas12f complexes. a,** Superimposition of two complexes based on the protein part. UnCas12f is colored grey. The C-lobe of UnCas12f.2 (321 - 529) was hidden for comparison. RMSD = 6.117Å (all atom). **b,** The N-lobe of AsCas12f.1 superimposed with the N-lobe of UnCas12f.1 (grey). RMSD = 6.117 Å (all-atom). **c,** The C-lobe of AsCas12f.1 superimposed with the C-lobe of UnCas12f.1 (grey). RMSD = 2.344 Å (all-atom).

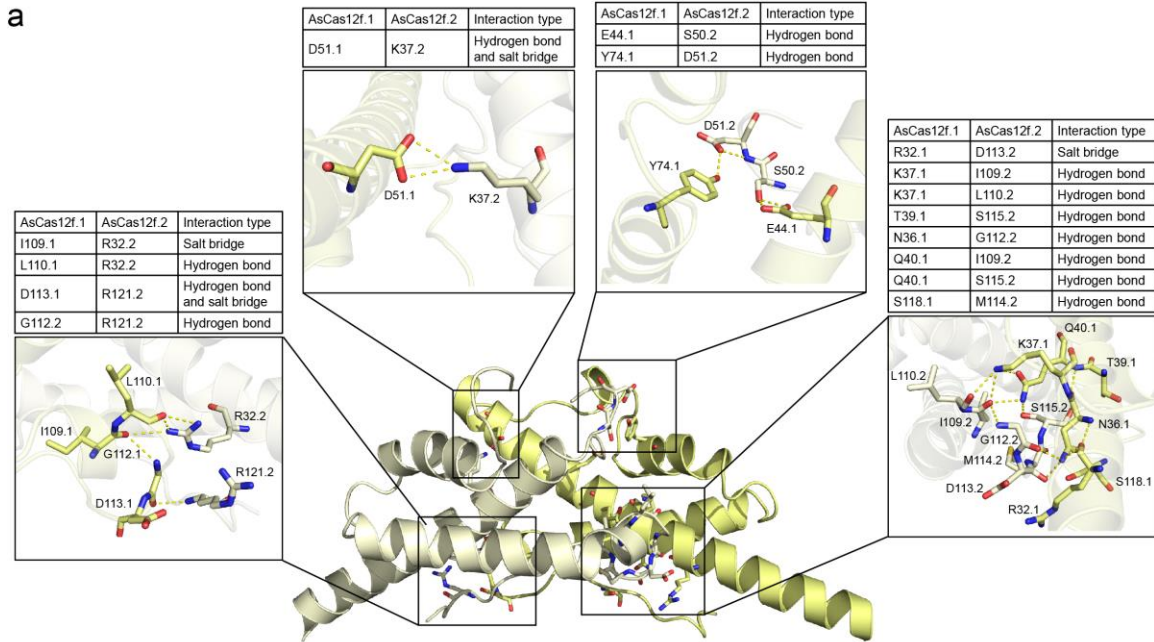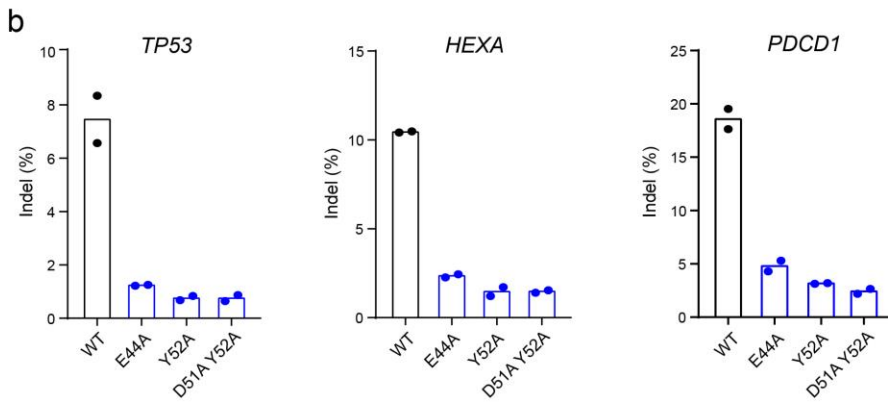

**Supplementary Fig. 12 | Dimerization is essential for the activity of AsCas12f. a,** Zoom-in views of the dimer interfaces. **b,** Indel frequencies generated by wild-type AsCas12f and AsCas12f variants bearing mutations that disrupt the dimer interfaces.

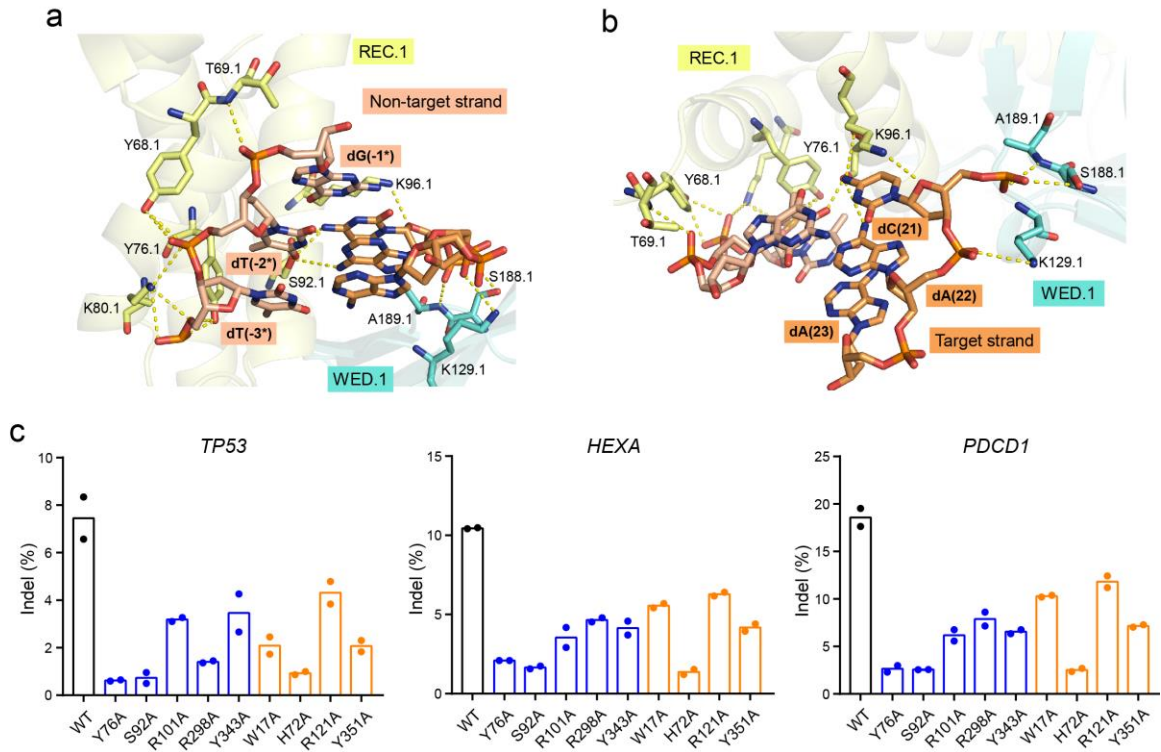

**Supplementary Fig. 13 | PAM and sgRNA recognition by AsCas12f. a, b**, Recognition of the non-target strand (**a**) and the target strand (**b**). Numberings of sgRNA and DNA are shown in Supplementary Figure 12. **c**, Indel frequencies generated by wild-type AsCas12f and AsCas12f variants bearing mutations that disrupt interactions between the protein and DNA (blue) or sgRNA (yellow).

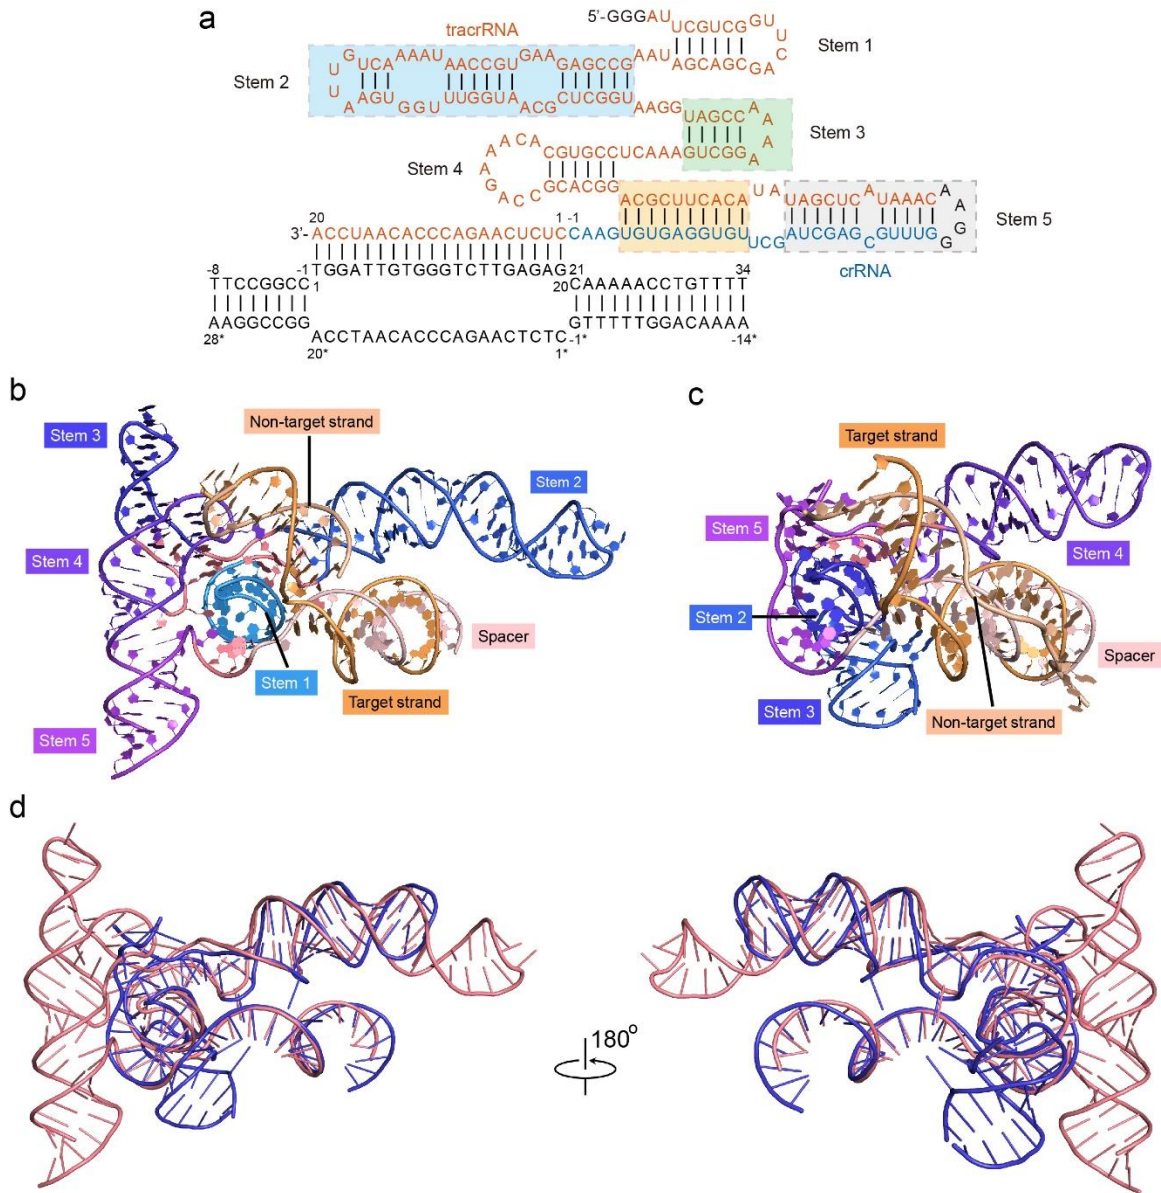

**Supplementary Fig. 14 | Comparison of AsCas12f and UnCas12f gRNAs. a**, Secondary structure scheme of the wild-type AsCas12f sgRNA and regions interacting with the target DNA. **b-c**, Structure of the sgRNA and the target dsDNA in AsCas12f-sgRNA-DNA (**b**) and UnCas12f-sgRNA-DNA (**c**) complexes. **d**, Superimposition of UnCas12f sgRNA (violet) and AsCas12f sgRNA (red).

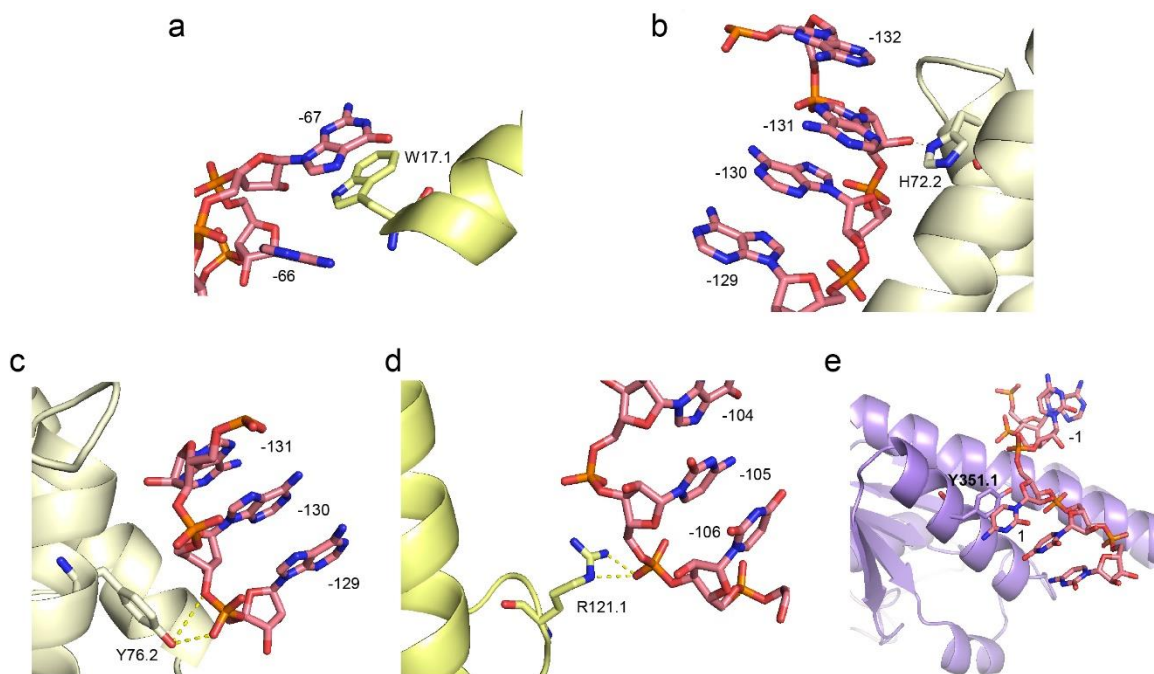

**Supplementary Fig. 15 | AsCas12f-gRNA interactions.** **a**, W17.1 forms a  $\pi - \pi$  interaction with G(-67) of the gRNA. **b**, H72.2 forms a hydrogen bond with A(-131) at  $O^2$  position. **c**, Y76.2 forms a hydrogen bond with the phosphate backbone of A(-129) of the gRNA. **d**, R121.1 forms a hydrogen bond with the phosphate backbone of C(-105) of the gRNA. **e**, Y351.1 forms a  $\pi - \pi$  interaction with C(1) of the gRNA.

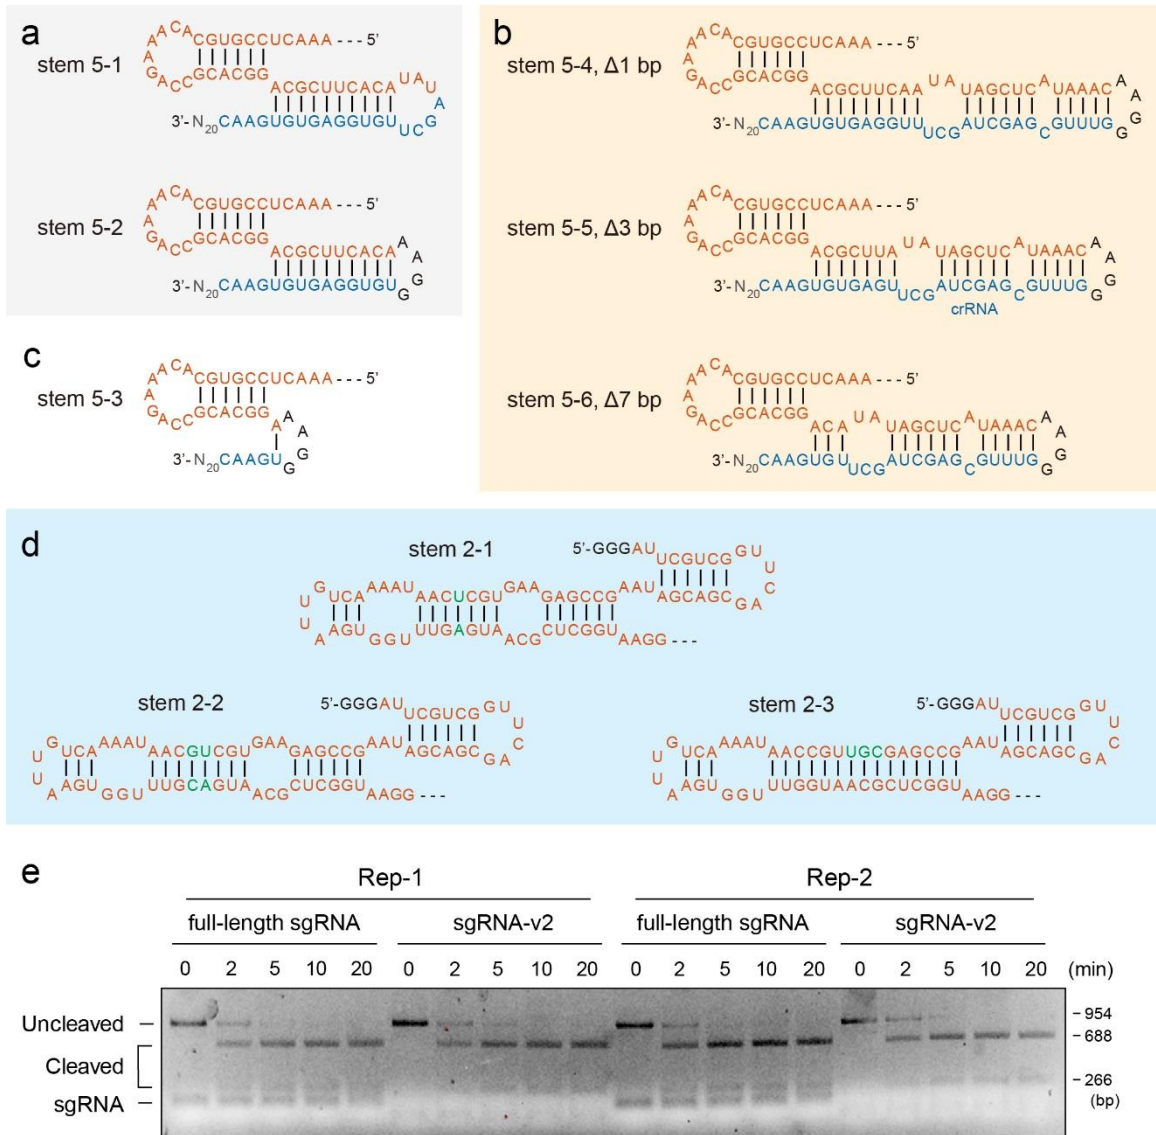

**Supplementary Fig. 16 | Schematics showing modifications on the AsCas12f gRNA. a-c,** Truncations of stem 5 (colored in the grey and yellow boxes in Supplementary Fig. 12a). **d,** Modifications of stem 3 (colored in the blue box in Supplementary Fig. 12a). **e,** Gel electrophoresis monitoring *in vitro* DNA cleavage over time courses using full-length sgRNA and sgRNA-v2. The assay was conducted using enAsCas12f at 37 °C. Expected DNA sizes are noted on the right of the gel images.



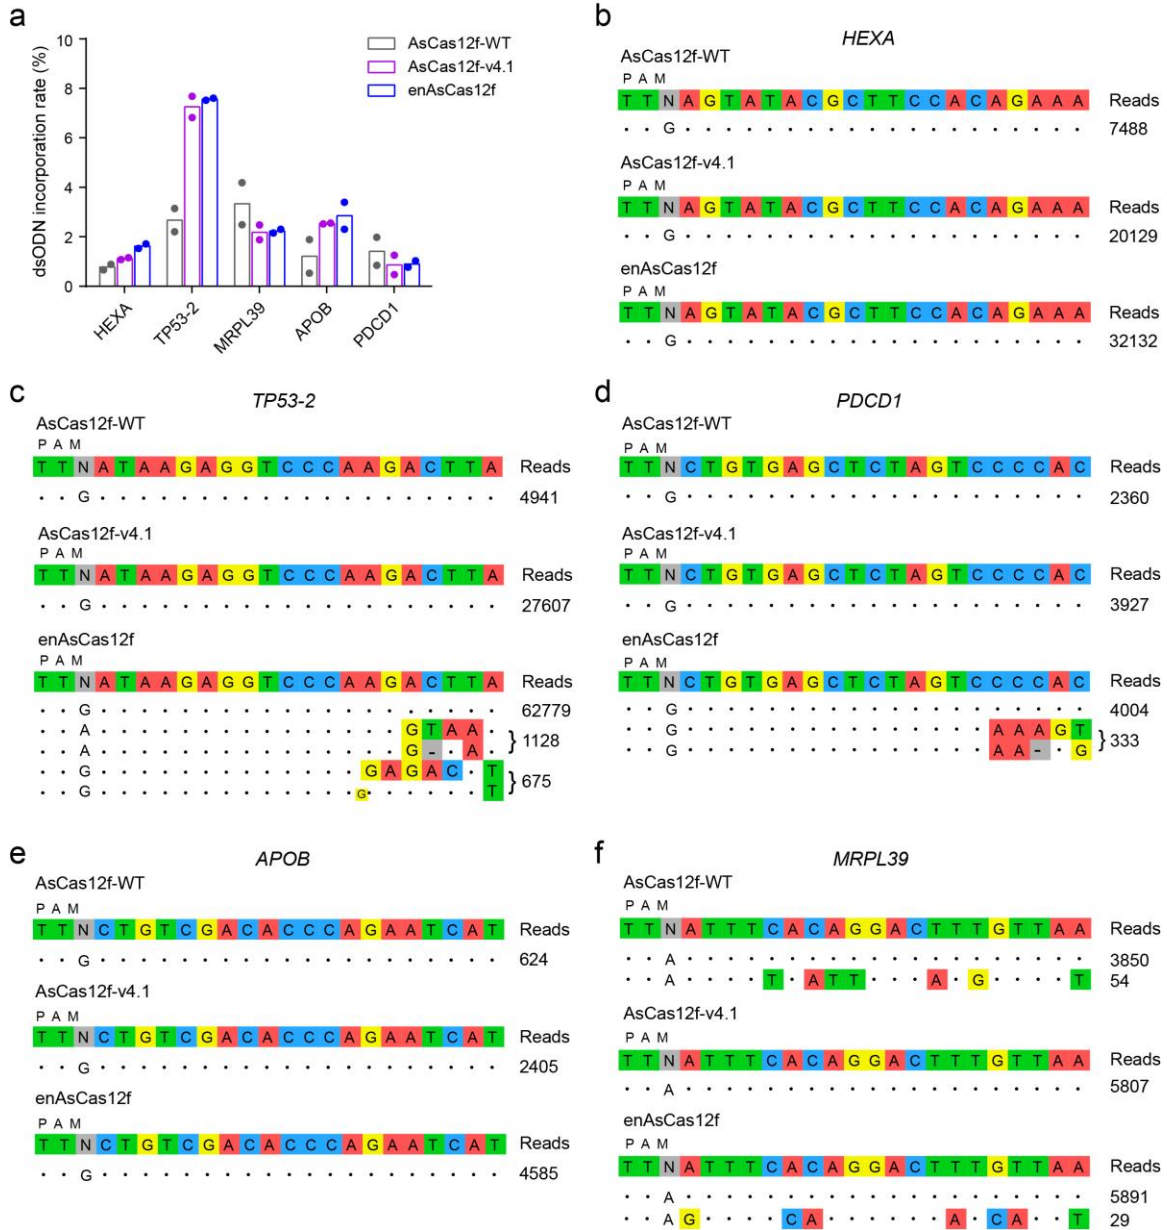

**Supplementary Fig. 17 | Genome-wide specificity of wild-type and engineered AsCas12f variants.** **a**, On-target GUIDE-seq tag integration efficiency measured by targeted amplicon sequencing. **b-f**, Off-target editing sites for wild-type AsCas12f, AsCas12f-v4.1, and enAsCas12f with gRNAs targeting *HEXA* (**b**), *TP53-2* (**c**), *PDCD1* (**d**), *APOB* (**e**), and *MRPL39* (**f**) loci, reported by GUIDE-seq in HEK293T cells. Mismatch positions are highlighted in colors. GUIDE-seq experiments were performed in duplicates, with the read counts of one replicate shown to the right of the corresponding sequences. Results from the other replicate are shown in Fig. 5. Full-length sgRNAs were applied in all GUIDE-seq experiments. In (f), the two off-target integrations detected in AsCas12f-WT and enAsCas12f samples are regarded as false positives because they are not detected in the other replicate nor other conditions for the same target.

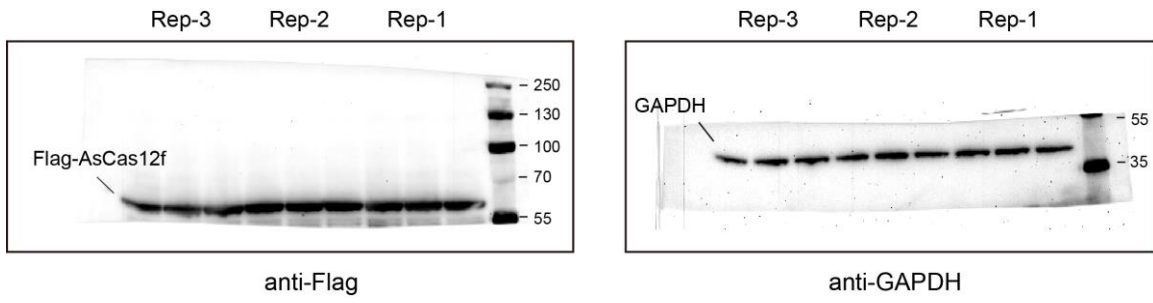

**Supplementary Fig. 18 | Uncropped scans for blots shown in Supplementary Fig. 5a.**
